# Supplementary material for: Evaluation of fecal DNA extraction protocols for human gut microbiome studies
Source: PubMed Central journal article supplement (PMC7367376; doi:10.1186/s12866-020-01894-5), 2020-07-17
Supplement: 12866_2020_1894_MOESM1_ESM.pdf [file 12866_2020_1894_MOESM1_ESM.pdf]

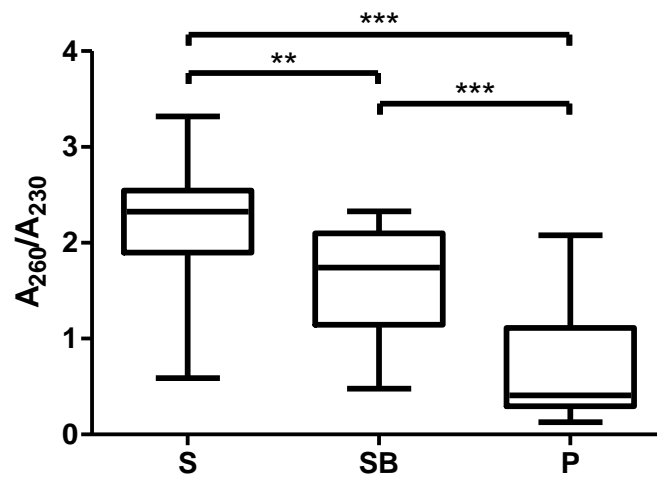

**Figure S1.**  $A_{260}/A_{230}$  of the DNA samples extracted through protocols S, SB, and P. (\*\* P-value < 0.01, \*\*\* P-value < 0.001; Kruskal-Wallis test with Dunn's multiple comparison test).
