# Supplementary material for: Evaluation of fecal DNA extraction protocols for human gut microbiome studies
Source: PubMed Central journal article supplement (PMC7367376; doi:10.1186/s12866-020-01894-5), 2020-07-17
Supplement: 12866_2020_1894_MOESM5_ESM.pdf [file 12866_2020_1894_MOESM5_ESM.pdf]

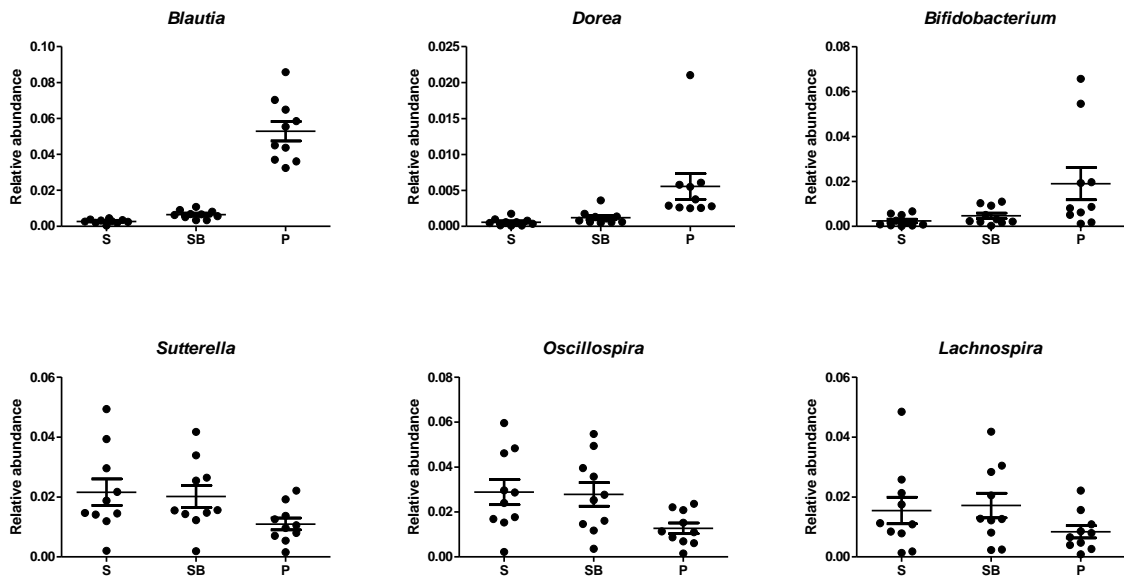

**Figure S4.** The relative abundances of several significantly differentially abundant genera obtained through protocol P in comparison with protocols SB and S.
